# Supplementary material for: Metal–organic coordination architectures of bis(1,2,4-triazole) ligands bearing different spacers: syntheses, structures and luminescent properties
Source: Royal Society of Chemistry journal article supplement (doi:10.1039/b913147g), 2010-01-01
Supplement: b913147g.pdf [file b913147g.pdf]

## *Supporting Information for*

### **Metal-Organic Coordination Architectures of Bis(1,2,4-triazole) Ligands Bearing Different Spacers: Syntheses, Structures and Luminescent Properties**

**Duo-Zhi Wang,<sup>a,b</sup> Tong-Liang Hu,<sup>a</sup> Jiong-Peng Zhao,<sup>a</sup> and Xian-He Bu<sup>a,\*</sup>**

<sup>a</sup>*Department of Chemistry, Nankai University, Tianjin 300071, P. R. China.*

<sup>b</sup>*College of Chemistry and Chemical Engineering, Xinjiang University, Urumqi 830046, P. R. China*

*Fax: +86-22-23502458; E-mail: [buxh@nankai.edu.cn](mailto:buxh@nankai.edu.cn)*

**Table S1** Selected Bond Distances (Å) and Angles (deg) for Complexes **1~6**

| <b>1</b>                                     |            |                                              |            |
|----------------------------------------------|------------|----------------------------------------------|------------|
| Cd(1) - N(1)                                 | 2.345(5)   | Cd(1) - N(4)                                 | 2.317(5)   |
| Cd(1)-O(1)                                   | 2.388(6)   |                                              |            |
| N(4)-Cd(1)-O(1)                              | 82.06(19)  | N(4)-Cd(1)-N(1)                              | 90.12(18)  |
| N(4) <sup>#1</sup> -Cd(1)-O(1)               | 97.94(19)  | N(4) <sup>#1</sup> -Cd(1)-N(1)               | 89.88(18)  |
| N(1) <sup>#1</sup> -Cd(1)-O(1)               | 96.5(2)    | N(1)-Cd(1)-O(1)                              | 83.5(2)    |
| <b>2</b>                                     |            |                                              |            |
| Hg(1)-N(3)                                   | 2.455(12)  | Hg(1)-Br(3)                                  | 2.4610(17) |
| Hg(1)-Br(2)                                  | 2.4712(16) |                                              |            |
| N(3)-Hg(1)-Br(3)                             | 95.5(3)    | N(3)-Hg(1)-Br(2)                             | 96.5(3)    |
| Br(3)-Hg(1)-Br(2)                            | 167.96(7)  |                                              |            |
| <b>3</b>                                     |            |                                              |            |
| Mn(1)-N(3)                                   | 2.300(4)   | Mn(1)-Cl(1)                                  | 2.525(2)   |
| N(3) <sup>#1</sup> -Mn(1)-N(3) <sup>#2</sup> | 95.3(2)    | N(3)-Mn(1)-N(3) <sup>#2</sup>                | 84.7(2)    |
| N(3) <sup>#2</sup> -Mn(1)-N(3) <sup>#3</sup> | 180.00     | N(3) <sup>#1</sup> -Mn(1)-Cl(1)              | 91.78(12)  |
| N(3)-Mn(1)-Cl(1)                             | 88.22(12)  |                                              |            |
| <b>4</b>                                     |            |                                              |            |
| Cu-N(1)                                      | 2.035(4)   | Cu-Cl(1)                                     | 2.8104(18) |
| N(1) <sup>#1</sup> -Cu-N(1)                  | 87.3(2)    | N(1) <sup>#1</sup> -Cu-N(1) <sup>#2</sup>    | 92.7(2)    |
| N(1)-Cu-N(1) <sup>#2</sup>                   | 87.3(2)    | N(1) <sup>#1</sup> -Cu-Cl(1)                 | 89.83(11)  |
| N(1)-Cu-Cl(1)                                | 90.17(11)  |                                              |            |
| <b>5</b>                                     |            |                                              |            |
| Cd(1)-N(1)                                   | 2.344(4)   | Cd(1)-N(1) <sup>#2</sup>                     | 2.345(4)   |
| Cd(1)-O(2) <sup>#2</sup>                     | 2.432(15)  | Cd(1)-O(2)                                   | 2.441(15)  |
| N(1)-Cd(1)-N(1) <sup>#2</sup>                | 83.0(2)    | N(1) <sup>#1</sup> -Cd(1)-N(1) <sup>#2</sup> | 97.0(2)    |
| N(1)-Cd(1)-O(2) <sup>#3</sup>                | 99.7(3)    | N(1) <sup>#1</sup> -Cd(1)-O(2) <sup>#3</sup> | 80.3(3)    |
| N(1) <sup>#2</sup> -Cd(1)-O(2) <sup>#3</sup> | 79.4(3)    | N(1) <sup>#3</sup> -Cd(1)-O(2) <sup>#3</sup> | 100.6(3)   |
| N(1)-Cd(1)-O(2)                              | 101.1(3)   | N(1) <sup>#1</sup> -Cd(1)-O(2)               | 78.9(3)    |
| N(1) <sup>#2</sup> -Cd(1)-O(2)               | 79.9(3)    | N(1) <sup>#3</sup> -Cd(1)-O(2)               | 100.1(3)   |
| O(2) <sup>#3</sup> -Cd(1)-O(2)               | 148.5(6)   | O(2) <sup>#2</sup> -Cd(1)-O(2)               | 31.5(6)    |
| <b>6</b>                                     |            |                                              |            |
| Cd(1)-N(1)                                   | 2.307(5)   | Cd(1)-N(7)                                   | 2.350(5)   |
| Cd(1)-N(4)                                   | 2.405(5)   |                                              |            |
| N(1) <sup>#1</sup> -Cd(1)-N(7) <sup>#1</sup> | 86.69(17)  | N(1) <sup>#1</sup> -Cd(1)-N(7)               | 93.31(17)  |
| N(1) <sup>#1</sup> -Cd(1)-N(4)               | 91.38(17)  | N(1)-Cd(1)-N(4)                              | 88.62(17)  |
| N(7) <sup>#1</sup> -Cd(1)-N(4)               | 86.18(17)  | N(7)-Cd(1)-N(4)                              | 93.82(17)  |

Symmetry code for **1**: #1  $-x, -y+2, -z+1$ . for **3**: #1  $-x+1, -y+1, -z$ ; #2  $-x+1, y, -z$ ; #3  $x, -y+1, z$ . for **4**: #1  $-x+1, -y, -z$ ; #2  $-x+1, y, -z$ . for **5**: #1  $-x, -y, -z$ ; #2  $x, -y, z$ ; #
